# Supplementary material
Source: publisher figshare collection journal article supplement (https://acs.figshare.com/ndownloader/files/26182556)
Supplement: Supplementary file 1 [file 26182556]

# Termite gut microbiota contribution to wheat straw delignification in anaerobic bioreactors

*Louison Dumond<sup>a</sup>, Pui Ying Lam<sup>b</sup>, Gijs van Erven<sup>c,d</sup>, Mirjam Kabel<sup>e</sup>, Fabien Mounet<sup>e</sup>,*

*Jacqueline Grima-Pettenati<sup>e</sup>, Yuki Tobimatsu<sup>b</sup>, Guillermina Hernandez-Raquet<sup>a,\*</sup>*

<sup>a</sup>Toulouse Biotechnology Institute, TBI, Université de Toulouse, CNRS, INRAE, INSA, Toulouse,  
France.

<sup>b</sup>Research Institute for Sustainable Humanosphere, Kyoto University, Gokasho, Uji, Kyoto, Japan.

<sup>c</sup>Wageningen University & Research, Laboratory of Food Chemistry, Bornse Weiland 9, 6708 WG,  
Wageningen, The Netherlands.

<sup>d</sup>Wageningen Food & Biobased Research, Bornse Weiland 9, 6708 WG, Wageningen, The  
Netherlands

<sup>e</sup>Laboratoire de Recherche en Sciences Végétales, Université de Toulouse III, CNRS, UPS, UMR  
5546, 24 Chemin de Borde Rouge, 31320 Castanet-Tolosan, France

Supporting table 1. Peak assignments for 2D HSQC NMR spectra of wheat cell walls.

Supporting table 2: Identity, structural classification and relative abundance of lignin-derived pyrolysis products by quantitative  $^{13}\text{C}$ -IS py-GC-MS. Average relative abundance of analytical triplicates.

Supplementary Material and Methods. Detailed description of the experimental methodology.

Number of pages: 9 (S1-S9)

Number of tables: 2

**Supporting Table S1.** Peak assignments for 2D HSQC NMR spectra of wheat cell walls.

| Labels                                       | $\delta_{\text{C}}/\delta_{\text{H}}$ (ppm) | Assignment                                             |
|----------------------------------------------|---------------------------------------------|--------------------------------------------------------|
| <i>Lignin and cinnamate aromatic signals</i> |                                             |                                                        |
| $\text{S}_{2/6}$                             | 104.2/6.77                                  | C2–H2 and C6–H6 in syringyl units                      |
| $\text{S}'_{2/6}$                            | 106.8/7.23, 106.6/7.07                      | C2–H2 and C6–H6 in C $\alpha$ -oxidized syringyl units |
| $\text{G}_2$                                 | 111.2/7.06                                  | C2–H2 in guaiacyl units                                |
| $\text{G}_{5/6}$                             | 119.3/6.88, 114.9/6.78                      | C5–H5 and C6–H6 in guaiacyl units                      |
| $\text{G}'_2$                                | 112.5/7.32, 111.6/7.53                      | C2–H2 in C $\alpha$ -oxidized guaiacyl units           |
| $\text{H}_{2/6}$                             | 128.0/7.23                                  | C2–H2 and C6–H6 in <i>p</i> -hydroxyphenyl units       |
| $\text{H}_{3/5}$                             | 114.9/6.74                                  | C3–H3 and C5–H5 in <i>p</i> -hydroxyphenyl units       |
| $\text{T}_3$                                 | 104.9/7.06                                  | C3–H3 in tricin residues                               |
| $\text{T}_6$                                 | 98.9/6.31                                   | C6–H6 in tricin residues                               |
| $\text{T}_8$                                 | 94.2/6.63                                   | C8–H8 in tricin residues                               |
| $\text{T}_{2'/6'}$                           | 104.3/7.36                                  | C2'–H2' and C6'–H6' in tricin residues                 |
| $\text{P}_{2/6}$                             | 130.1/7.50                                  | C2–H2 and C6–H6 in <i>p</i> -coumarate residues        |
| $\text{P}_{3/5}$                             | 115.6/6.85                                  | C3–H3 and C5–H5 in <i>p</i> -coumarate residues        |
| $\text{P}_8$                                 | 113.8/6.36                                  | C8–H8 in <i>p</i> -coumarate residues                  |

|                      |            |                            |
|----------------------|------------|----------------------------|
| <b>F<sub>2</sub></b> | 111.0/7.36 | C2–H2 in ferulate residues |
| <b>F<sub>6</sub></b> | 123.2/7.12 | C6–H6 in ferulate residues |

*Lignin inter-monomeric linkage and end-unit signals*

|                                   |                      |                                                 |
|-----------------------------------|----------------------|-------------------------------------------------|
| <b>I<sub>α</sub></b>              | 71.5/4.87            | Cα–Hα in β–O–4 units                            |
| <b>I<sub>β</sub></b>              | 86.2/4.22, 83.9/4.38 | Cβ–Hβ in β–O–4 units                            |
| <b>I<sub>γ</sub> (γ-free)</b>     | 60.5/3.86            | Cγ–H γ in γ-free β–O–4 units                    |
| <b>I<sub>γ</sub> (γ-acylated)</b> | 64.6/4.30            | Cγ–H γ in γ-acylated β–O–4 units                |
| <b>II<sub>α</sub></b>             | 87.2/5.50            | Cα–Hα in β–5 substructures                      |
| <b>II<sub>β</sub></b>             | 53.6/3.49            | Cβ–Hβ in β–5 substructures                      |
| <b>III<sub>α</sub></b>            | 85.0/4.67            | Cα–Hα in resinol-type β–β substructures         |
| <b>III'<sub>α</sub></b>           | 82.9/4.98            | Cα–Hα in tetrahydrofuran-type β–β substructures |
| <b>IV<sub>γ</sub></b>             | 61.8/4.14            | Cγ–Hγ in cinnamyl alcohol end-units             |
| <b>IV'<sub>γ</sub></b>            | 193.9/9.61           | Cγ–Hγ in cinnamylaldehyde end-units             |
| <b>IV''<sub>α</sub></b>           | 190.8/9.81           | Cα–Hα in benzaldehyde end-units                 |
| <b>IV'''<sub>β</sub></b>          | 41.2/3.13            | Cβ–Hβ in HPV/HPS end-units                      |
| <b>IV'''<sub>γ</sub></b>          | 57.3/3.83            | Cγ–Hγ in HPV/HPS end-units                      |

*Supporting Table S1 (continued)**Lignin methoxyl signals*

|            |           |                                 |
|------------|-----------|---------------------------------|
| <b>OMe</b> | 55.7/3.74 | C–H in aromatic methoxyl groups |
|------------|-----------|---------------------------------|

*Polysaccharide anomeric signals*

|                         |            |                                                           |
|-------------------------|------------|-----------------------------------------------------------|
| <b>Gl<sub>1</sub></b>   | 103.5/4.44 | C1–H1 in (1→4)-β-D-glucopyranosyl units                   |
| <b>X<sub>1</sub></b>    | 102.1/4.28 | C1–H1 in (1→4)-β-D-xylopyranosyl units                    |
| <b>X'<sub>1</sub></b>   | 99.9/4.58  | C1–H1 in 2- <i>O</i> -acetyl-β-D-xylopyranosyl units      |
| <b>X''<sub>1</sub></b>  | 101.8/4.40 | C1–H1 in 3- <i>O</i> -acetyl-β-D-xylopyranosyl units      |
| <b>X'''<sub>1</sub></b> | 99.1/4.78  | C1–H1 in 2,3-di- <i>O</i> -acetyl-β-D-xylopyranosyl units |
| <b>A<sub>1</sub></b>    | 108.2/4.90 | C1–H1 in α-L-arabinofuranosyl units                       |
| <b>U<sub>1</sub></b>    | 97.7/5.27  | C1–H1 in 4- <i>O</i> -methyl-α-D-glucuronopyranosyl units |

Measured in DMSO-*d*<sub>6</sub>/pyridine-*d*<sub>5</sub> (4:1, v/v). Signal assignment was based on comparison with NMR data in literature.<sup>1-7</sup>

**Supporting Table S2.** Identity, structural classification and relative abundance of lignin-derived pyrolysis products by quantitative  $^{13}\text{C}$ -IS py-GC-MS. Average relative abundance of analytical triplicates.

| #  | Compound                         | CAS      | Retention time (min) | Structural feature                      | Sidechain length | M <sub>w</sub> $^{12}\text{C}$ (g·mol <sup>-1</sup> ) | Quan ion $^{12}\text{C}$ [M-e] | Original | <i>N. lujae</i> | <i>M. parvus</i> | <i>T. hospes</i> |
|----|----------------------------------|----------|----------------------|-----------------------------------------|------------------|-------------------------------------------------------|--------------------------------|----------|-----------------|------------------|------------------|
| 1  | phenol                           | 108952   | 9.79                 | H, unsub.                               | 0                | 94                                                    | 94.04132                       | 0.7      | 0.7             | 0.7              | 0.7              |
| 2  | guaiacol                         | 90051    | 10.03                | G, unsub.                               | 0                | 124                                                   | 124.05188                      | 2.8      | 3.5             | 3.8              | 3.6              |
| 3  | 2-methylphenol                   | 95487    | 11.03                | H, methyl                               | C <sub>α</sub>   | 108                                                   | 108.05698                      | 0.1      | 0.1             | 0.1              | 0.2              |
| 4  | 4-methylphenol (+3-MP)           | 106445   | 12.00                | H, methyl                               | C <sub>α</sub>   | 108                                                   | 107.04914                      | 0.4      | 0.4             | 0.3              | 0.5              |
| 5  | 4-methylguaiacol                 | 93516    | 12.71                | G, methyl                               | C <sub>α</sub>   | 138                                                   | 138.06753                      | 1.6      | 1.7             | 1.7              | 1.9              |
| 6  | 2,4-dimethylphenol               | 105679   | 13.18                | H, methyl                               | C <sub>α</sub>   | 122                                                   | 107.04914                      | 0.1      | 0.1             | 0.1              | 0.1              |
| 7  | 4-ethylphenol                    | 123079   | 14.25                | H, misc.                                | C <sub>β</sub>   | 122                                                   | 107.04914                      | 0.1      | 0.1             | 0.1              | 0.1              |
| 8  | 4-ethylguaiacol                  | 2785899  | 14.83                | G, misc.                                | C <sub>β</sub>   | 152                                                   | 137.05971                      | 0.2      | 0.2             | 0.2              | 0.2              |
| 9  | 4-vinylguaiacol                  | 7786610  | 16.29                | G, vinyl                                | C <sub>β</sub>   | 150                                                   | 150.06753                      | 26.7     | 23.7            | 23.4             | 23.3             |
| 10 | 4-vinylphenol                    | 2628173  | 16.46                | H, vinyl                                | C <sub>β</sub>   | 120                                                   | 120.05697                      | 8.1      | 6.2             | 6.5              | 6.6              |
| 11 | eugenol                          | 97530    | 16.89                | G, misc.                                | C <sub>γ</sub>   | 164                                                   | 164.08318                      | 0.2      | 0.2             | 0.2              | 0.3              |
| 12 | 4-propylguaiacol                 | 2785877  | 16.99                | G, misc.                                | C <sub>γ</sub>   | 166                                                   | 137.05971                      | 0.1      | 0.1             | 0.1              | 0.2              |
| 13 | syringol                         | 91101    | 17.64                | S, unsub.                               | 0                | 154                                                   | 154.06245                      | 1.7      | 1.9             | 2.0              | 1.9              |
| 14 | <i>cis</i> -isoeugenol           | 97541    | 18.25                | G, misc.                                | C <sub>γ</sub>   | 164                                                   | 164.08318                      | 0.1      | 0.1             | 0.1              | 0.1              |
| 15 | 4-propenylphenol                 | 539128   | 19.24                | H, misc.                                | C <sub>γ</sub>   | 134                                                   | 133.06479                      | 0.1      | 0.1             | 0.1              | 0.1              |
| 16 | <i>trans</i> -isoeugenol         | 97541    | 19.50                | G, misc.                                | C <sub>γ</sub>   | 164                                                   | 164.08318                      | 0.8      | 1.0             | 0.9              | 1.0              |
| 17 | 4-methylsyringol                 | 6638057  | 19.86                | S, methyl                               | C <sub>α</sub>   | 168                                                   | 168.07810                      | 0.8      | 0.8             | 0.8              | 0.8              |
| 18 | vanillin                         | 121335   | 19.99                | G, C <sub>α</sub> -O                    | C <sub>α</sub>   | 152                                                   | 151.03897                      | 1.2      | 1.2             | 1.1              | 1.2              |
| 19 | 4-propynguaiacol                 | -        | 20.23                | G, misc.                                | C <sub>γ</sub>   | 162                                                   | 162.06753                      | 0.1      | 0.1             | 0.1              | 0.1              |
| 20 | 4-allenuguaiacol                 | -        | 20.49                | G, misc.                                | C <sub>γ</sub>   | 162                                                   | 162.06753                      | 0.1      | 0.1             | 0.1              | 0.1              |
| 21 | homovanillin                     | 5603242  | 21.44                | G, C <sub>β</sub> -O                    | C <sub>β</sub>   | 166                                                   | 137.05971                      | 0.4      | 0.5             | 0.4              | 0.5              |
| 22 | 4-ethylsyringol                  | 14059928 | 21.58                | S, misc.                                | C <sub>β</sub>   | 182                                                   | 167.07022                      | 0.1      | 0.1             | 0.1              | 0.1              |
| 23 | vanillic acid methyl ester       | 3943746  | 21.82                | G, C <sub>α</sub> -O                    | C <sub>α</sub>   | 182                                                   | 182.05736                      | 0.01     | 0.01            | 0.01             | 0.01             |
| 24 | acetovanillone                   | 498022   | 21.89                | G, C <sub>α</sub> -O                    | C <sub>β</sub>   | 166                                                   | 151.03897                      | 0.4      | 0.4             | 0.4              | 0.4              |
| 25 | 4-hydroxybenzaldehyde            | 123080   | 22.76                | H, C <sub>α</sub> -O                    | C <sub>α</sub>   | 122                                                   | 121.02848                      | 0.1      | 0.1             | 0.1              | 0.1              |
| 26 | 4-vinylsyringol                  | 28343228 | 22.90                | S, vinyl                                | C <sub>β</sub>   | 180                                                   | 180.07810                      | 4.8      | 4.6             | 4.5              | 4.4              |
| 27 | guaiacylacetone                  | 2503460  | 23.10                | G, C <sub>β</sub> -O                    | C <sub>γ</sub>   | 180                                                   | 137.05971                      | 0.3      | 0.4             | 0.4              | 0.4              |
| 28 | 4-allylsyringol                  | 6627889  | 23.31                | S, misc.                                | C <sub>γ</sub>   | 194                                                   | 194.09373                      | 0.3      | 0.3             | 0.2              | 0.3              |
| 29 | propiovanillone                  | 1835149  | 23.79                | S, C <sub>α</sub> -O                    | C <sub>γ</sub>   | 180                                                   | 151.03897                      | 0.03     | 0.03            | 0.03             | 0.03             |
| 30 | guaiacyl vinyl ketone            | -        | 24.09                | G, C <sub>α</sub> -O                    | C <sub>γ</sub>   | 178                                                   | 151.03897                      | 0.2      | 0.2             | 0.2              | 0.2              |
| 31 | guaiacyl diketone                | 2034608  | 24.32                | G, C <sub>α</sub> -O, C <sub>β</sub> -O | C <sub>γ</sub>   | 194                                                   | 151.03897                      | 0.3      | 0.3             | 0.3              | 0.3              |
| 32 | <i>cis</i> -4-propenylsyringol   | 26624135 | 24.43                | S, misc.                                | C <sub>γ</sub>   | 194                                                   | 194.09373                      | 0.2      | 0.2             | 0.1              | 0.2              |
| 33 | 4-propynesyringol                | -        | 25.06                | S, misc.                                | C <sub>γ</sub>   | 192                                                   | 192.07810                      | 0.2      | 0.2             | 0.1              | 0.2              |
| 34 | 4-allenesyringol                 | -        | 25.27                | S, misc.                                | C <sub>γ</sub>   | 192                                                   | 192.07810                      | 0.1      | 0.1             | 0.1              | 0.1              |
| 35 | <i>trans</i> -4-propenylsyringol | 26624135 | 25.72                | S, misc.                                | C <sub>γ</sub>   | 194                                                   | 194.09373                      | 1.2      | 1.2             | 1.2              | 1.3              |
| 36 | dihydroconiferyl alcohol         | 2305137  | 25.81                | S, C <sub>γ</sub> -O                    | C <sub>γ</sub>   | 182                                                   | 137.05971                      | 0.1      | 0.2             | 0.2              | 0.2              |
| 37 | syringaldehyde                   | 134963   | 26.34                | S, C <sub>α</sub> -O                    | C <sub>α</sub>   | 182                                                   | 182.05736                      | 0.9      | 0.9             | 0.9              | 0.9              |
| 38 | <i>cis</i> -coniferyl-alcohol    | 458355   | 26.42                | G, C <sub>γ</sub> -O                    | C <sub>γ</sub>   | 180                                                   | 137.05971                      | 1.1      | 1.2             | 1.2              | 1.2              |
| 39 | homosyringaldehyde               | -        | 27.32                | S, C <sub>β</sub> -O                    | C <sub>β</sub>   | 196                                                   | 167.07027                      | 1.1      | 1.1             | 0.9              | 1.0              |
| 40 | syringic acid methyl ester       | 884355   | 27.66                | S, C <sub>α</sub> -O                    | C <sub>α</sub>   | 212                                                   | 212.06793                      | 0.02     | 0.02            | 0.02             | 0.02             |
| 41 | acetosyringone                   | 2478388  | 27.76                | S, C <sub>α</sub> -O                    | C <sub>β</sub>   | 196                                                   | 181.04954                      | 0.7      | 0.7             | 0.6              | 0.7              |
| 42 | <i>trans</i> -coniferyl alcohol  | 458355   | 28.11                | G, C <sub>γ</sub> -O                    | C <sub>γ</sub>   | 180                                                   | 137.05971                      | 21.1     | 24.8            | 25.8             | 25.6             |
| 43 | <i>trans</i> -coniferaldehyde    | 458366   | 28.50                | G, C <sub>γ</sub> -O                    | C <sub>γ</sub>   | 178                                                   | 147.04406                      | 1.4      | 1.4             | 1.4              | 1.4              |
| 44 | syringylacetone                  | 19037582 | 28.68                | S, C <sub>β</sub> -O                    | C <sub>γ</sub>   | 210                                                   | 167.07027                      | 0.4      | 0.4             | 0.4              | 0.4              |
| 45 | propiosyringone                  | 5650431  | 29.29                | S, C <sub>α</sub> -O                    | C <sub>γ</sub>   | 210                                                   | 181.04954                      | 0.05     | 0.05            | 0.05             | 0.05             |
| 46 | syringyl diketone                | 6925651  | 29.43                | S, C <sub>α</sub> -O, C <sub>β</sub> -O | C <sub>γ</sub>   | 224                                                   | 181.04954                      | 0.3      | 0.3             | 0.2              | 0.3              |
| 47 | syringyl vinyl ketone            | -        | 29.57                | S, C <sub>α</sub> -O                    | C <sub>γ</sub>   | 208                                                   | 181.04954                      | 0.03     | 0.03            | 0.03             | 0.03             |
| 48 | dihydrosinapyl alcohol           | 20736258 | 31.13                | G, C <sub>γ</sub> -O                    | C <sub>γ</sub>   | 212                                                   | 168.07841                      | 0.1      | 0.1             | 0.1              | 0.1              |
| 49 | <i>cis</i> -sinapyl alcohol      | 537337   | 31.63                | S, C <sub>γ</sub> -O                    | C <sub>γ</sub>   | 210                                                   | 167.07027                      | 1.0      | 1.0             | 1.0              | 0.9              |

|    |                       |         |       |                      |                |     |           |      |      |      |      |
|----|-----------------------|---------|-------|----------------------|----------------|-----|-----------|------|------|------|------|
| 50 | trans-sinapyl alcohol | 537337  | 33.31 | S, C <sub>v</sub> -O | C <sub>v</sub> | 210 | 167.07027 | 15.6 | 15.9 | 15.3 | 14.5 |
| 51 | trans-sinapaldehyde   | 4206580 | 33.54 | S, C <sub>v</sub> -O | C <sub>v</sub> | 208 | 208.07301 | 1.3  | 1.3  | 1.1  | 1.2  |

## Supplementary Material and Methods

### Lignocellulose substrate and termite gut inocula

Wheat straw from the winter wheat variety Koreli was collected at an experimental farm (INRAE, Boissy-le-Repos, France) in August 2011. After harvesting, the straw was milled to 2 mm and stored at room temperature (20–25°C). As described in our previous work,<sup>8</sup> four different species of higher termites (Termitidae family) *Microcerotermes parvus*, *Termes hospes*, *Nasutitermes ephratae*, and an undescribed species closely related to *N. lujae* (herein after *N. lujae*) were selected as inocula. The initial termite gut inoculum (500 dissected guts) from each termite was provided by IRD (Institute for Research and Development, Bondy, France).

### Anaerobic bioreactors

The lignocellulose degradation capacity of the different gut microbiomes were assessed in two replicate anaerobic bioreactors (Applikon MiniBio 500) for each termite species as previously described.<sup>8</sup> Briefly, following centrifugation ( $7,197 \times g$ , 10 min, 4°C) and elimination of the saline PBS solution, termite guts (500 guts) were used to inoculate 400 mL of mineral media

(MM),<sup>1</sup> supplemented with 250  $\mu$ L of V7 vitamin solution<sup>9</sup> and 1 mL of sterilized (0.2  $\mu$ m filtration) trace elements solution.<sup>8</sup> Milled wheat straw (2 mm) was autoclaved (120°C, 20 min and 1.2 bars) and added to the medium (20 g.L<sup>-1</sup>) as the sole carbon source. Stirred bioreactors (400 rpm) were operated under strict anaerobic conditions. The absence of dissolved oxygen was ensured by nitrogen flushing after inoculation and continuous monitoring with a polarographic dissolved oxygen probe (AppliSens). The temperature was set to 35°C and pH was maintained at 6.15 by adding a 2 M NaOH solution. During the incubation, methane production was monitored and, if necessary, inhibited by the addition of 2-bromoethanesulfonate (BES), a methanogenesis inhibitor, until a maximum concentration of 10 mM. At the end of the 20 days of incubation, VFA and gas production were determined and the whole culture broth was snap frozen in liquid nitrogen and kept at -80°C until further use. For chemical characterization replicate samples were pooled together.

### **Volatile solid quantification**

Wheat straw concentration was determined at the beginning and at the end of the 20-day incubation by measuring the total (TS) and volatile (VS) solids. TS were determined using 10 mL samples that were first centrifuged (7,197  $\times$  g, 10 min), rinsed twice with distilled water and dried for 48 h at 55°C. The mineral fraction (MF) was estimated by mineralization of the

samples at 500°C for 2 h, and VS were determined by subtracting MF from TS. Wheat straw degradation was reported as percentage of VS (% w/w) related to the initial VS mass.

### **Cell wall extraction and grinding**

Extractive-free cell wall residues (CWR) were obtained by sonication-solvent extraction.<sup>5</sup> Two g of wheat straw samples with 40 ml of ultrapure water were sonicated for 20 min at room temperature then centrifuged (5 min, 7197g, 20°C). The water was removed and replaced by 80% ethanol:water and the sonication/centrifugation cycle was repeated twice and then washed with 100% acetone. CWR was obtained after drying at room temperature overnight and for 24 h at 55°C. CWR was then milled in a ball mill MM 400 (Retsch) by two successive steps (15s mill at 30 Hz.s<sup>-1</sup>) with a 2 cm diameter metal ball.

### **Polysaccharide analysis and Klason lignin determination**

Wheat straw composition was determined on the original wheat straw and the digested samples collected from the bioreactors at the end of the incubation period kept at -80°C. These last were thawed, the replicates were mixed together and centrifuged (7,197 g, 10 min); the solid fraction was then washed with distilled water and dried at 55°C (48h). Raw wheat straw



was incubated in the culture medium for 4 hours, and then treated as the digested samples. Their chemical composition was determined using the sulfuric acid hydrolysis method described by de Souza et al.<sup>10</sup> and modified by Lazuka et al.<sup>11</sup> on triplicate 80 mg samples, using a the first hydrolysis step of 1h, 30°C and a second step for 1h at 120°C in an oil bath. The insoluble residue was washed with distilled water and dried at 105 °C overnight to determine Klason lignin content. The soluble fraction was filtered and monomeric sugar composition was determined on an Ultimate 3000 Dionex HPLC with refractive index detector (Thermo Scientific) equipped with a BioRad Aminex HPX 87H affinity column, as described previously.<sup>12</sup>

### Thioacidolysis

Thiacidolysis of the samples was done according to Méchin et al.<sup>13</sup> The thioacidolysis solution was prepared by adding 20ml ethanethiol and 5ml BF<sub>3</sub> etherate in 40 ml dioxane and adjusted to 200ml with dioxane. 10 ml thioacidolysis solution with and 100µl of tetracosane 1.25 mg/ml was added to 10 mg of dry CWR. An aliquot of this solution (10 µL) was dried and trimethylsilylated (TMS) with 50 µL of *N,O*-bis(trimethylsilyl)trifluoroacetamide and 5 µL of ACS-grade pyridine for 1 h at room temperature. The TMS sample was injected (1 µL) onto a Trace1300 GC/MS (Thermoscientific) equipped with a Triple Quadripole-Ion trap in electronic

impact mode with a source at 220 °C, an interface at 280 °C, and a 50 to 650 m/z scanning range. The samples were analyzed on an Agilent DB-5 column (Agilent Technologies) operated in the temperature program mode (from 50 to 110 °C at +30 °C/min, then 110 to 320°C at +6 °C/min), with helium carrier gas at a 1.5 mL/min flow rate.<sup>14</sup>

## References

- (1) Brennan, M.; McLean, J.P.; Altaner, C.M.; Ralph, J.; Harris, P.J. Cellulose microfibril angles and cell-wall polymers in different wood types of *Pinus radiata*. *Cellulose*. **2012**, *19*, 1385–1404.
- (2) van Erven, G.; Hilgers, R.; Waard, P. de; Gladbeek, E.-J.; van Berkel, W. J. H.; Kabel, M. A. Elucidation of In Situ Ligninolysis Mechanisms of the Selective White-Rot Fungus *Ceriporiopsis Subvermispora*. *ACS Sustainable Chem. Eng.* **2019**, *7*, 16757–16764.
- (3) Kim, H.; Ralph, J. Solution-state 2D NMR of ball-milled plant cell wall gels in DMSO-*d*<sub>6</sub>/pyridine-*d*<sub>5</sub>. *Org. Biomol. Chem.* **2010**, *8*, 576–591.
- (4) Lan, W., Lu, F., Regner, M., Zhu, Y., Rencoret, J., Ralph, S.A., et al. Tricin, a flavonoid monomer in monocot lignification. *Plant Physiol.* **2015**, *167*, 1284–1295.
- (5) Mansfield, S.D.; Kim, H.; Lu, F.; Ralph, J. Whole plant cell wall characterization using solution-state 2D NMR. *Nat. Protoc.* **2012**, *7*, 1579–1589.
- (6) Rencoret, J., Gutiérrez, A., Nieto, L., Jiménez-Barbero, J., Faulds, C.B., Kim, H., et al. Lignin composition and structure in young versus adult *Eucalyptus globulus* plants. *Plant Physiol.* **2011**, *155*, 667–682.
- (7) Tarmadi, D., Tobimatsu, Y., Yamamura, M., Miyamoto, T., Miyagawa, Y., Umezawa, T. et al. NMR studies on lignocellulose deconstructions in the digestive system of the lower termite *Coptotermes formosanus* Shiraki. *Sci. Rep.* **2018**, *8*, 1290, 1–9.
- (8) Auer, L.; Lazuka, A.; Sillam-Dussès, D.; Miambi, E.; O'Donohue, M.; Hernandez-Raquet, G. Uncovering the potential of termite gut microbiome for lignocellulose bioconversion in anaerobic batch bioreactors. *Front. Microbiol.*, **2017**, *8*, 2623, 1–14.

- (9) Pfennig, N.; Trüper, H. G. The Family Chromatiaceae. In *The Prokaryotes: A handbook on the biology of bacteria: ecophysiology, isolation, identification, applications*; Balows, A., Trüper, H. G., Dworkin, M., Harder, W., Schleifer, K.-H., Eds.; Springer: New York, NY, 1992; pp 3200–3221.
- (10) de Souza, A. C.; Rietkerk, T.; Selin, C. G. M.; Lankhorst, P. P. A Robust and universal NMR method for the compositional analysis of polysaccharides. *Carbohydr. Polym.* **2013**, *95*, 657–663.
- (11) Lazuka, A.; Auer, L.; Bozonnet, S.; Morgavi, D. P.; O'Donohue, M.; Hernandez-Raquet, G. Efficient anaerobic transformation of raw wheat straw by a robust cow rumen-derived microbial consortium. *Bioresour. Technol.*, **2015**, *196*, 241–249.
- (12) Monlau, F.; Barakat, A.; Steyer, J. P.; Carrere, H. Comparison of seven types of thermo-chemical pretreatments on the structural features and anaerobic digestion of sunflower stalks. *Bioresour. Technol.* **2012**, *120*, 241–247.
- (13) Méchin, V.; Laluc, A.; Legée, F.; Cézard, L.; Denoue, D.; Barrière, Y.; Lapierre, C. Impact of the Brown-Midrib Bm5 mutation on maize lignins. *J. Agric. Food Chem.*, **2014**, *62*, 5102–5107.
- (14) Ployet, R. Régulation de la formation du bois chez l'eucalyptus lors du développement et en réponse à des contraintes environnementales. phd, Université de Toulouse, Université Toulouse III - Paul Sabatier, 2017.
